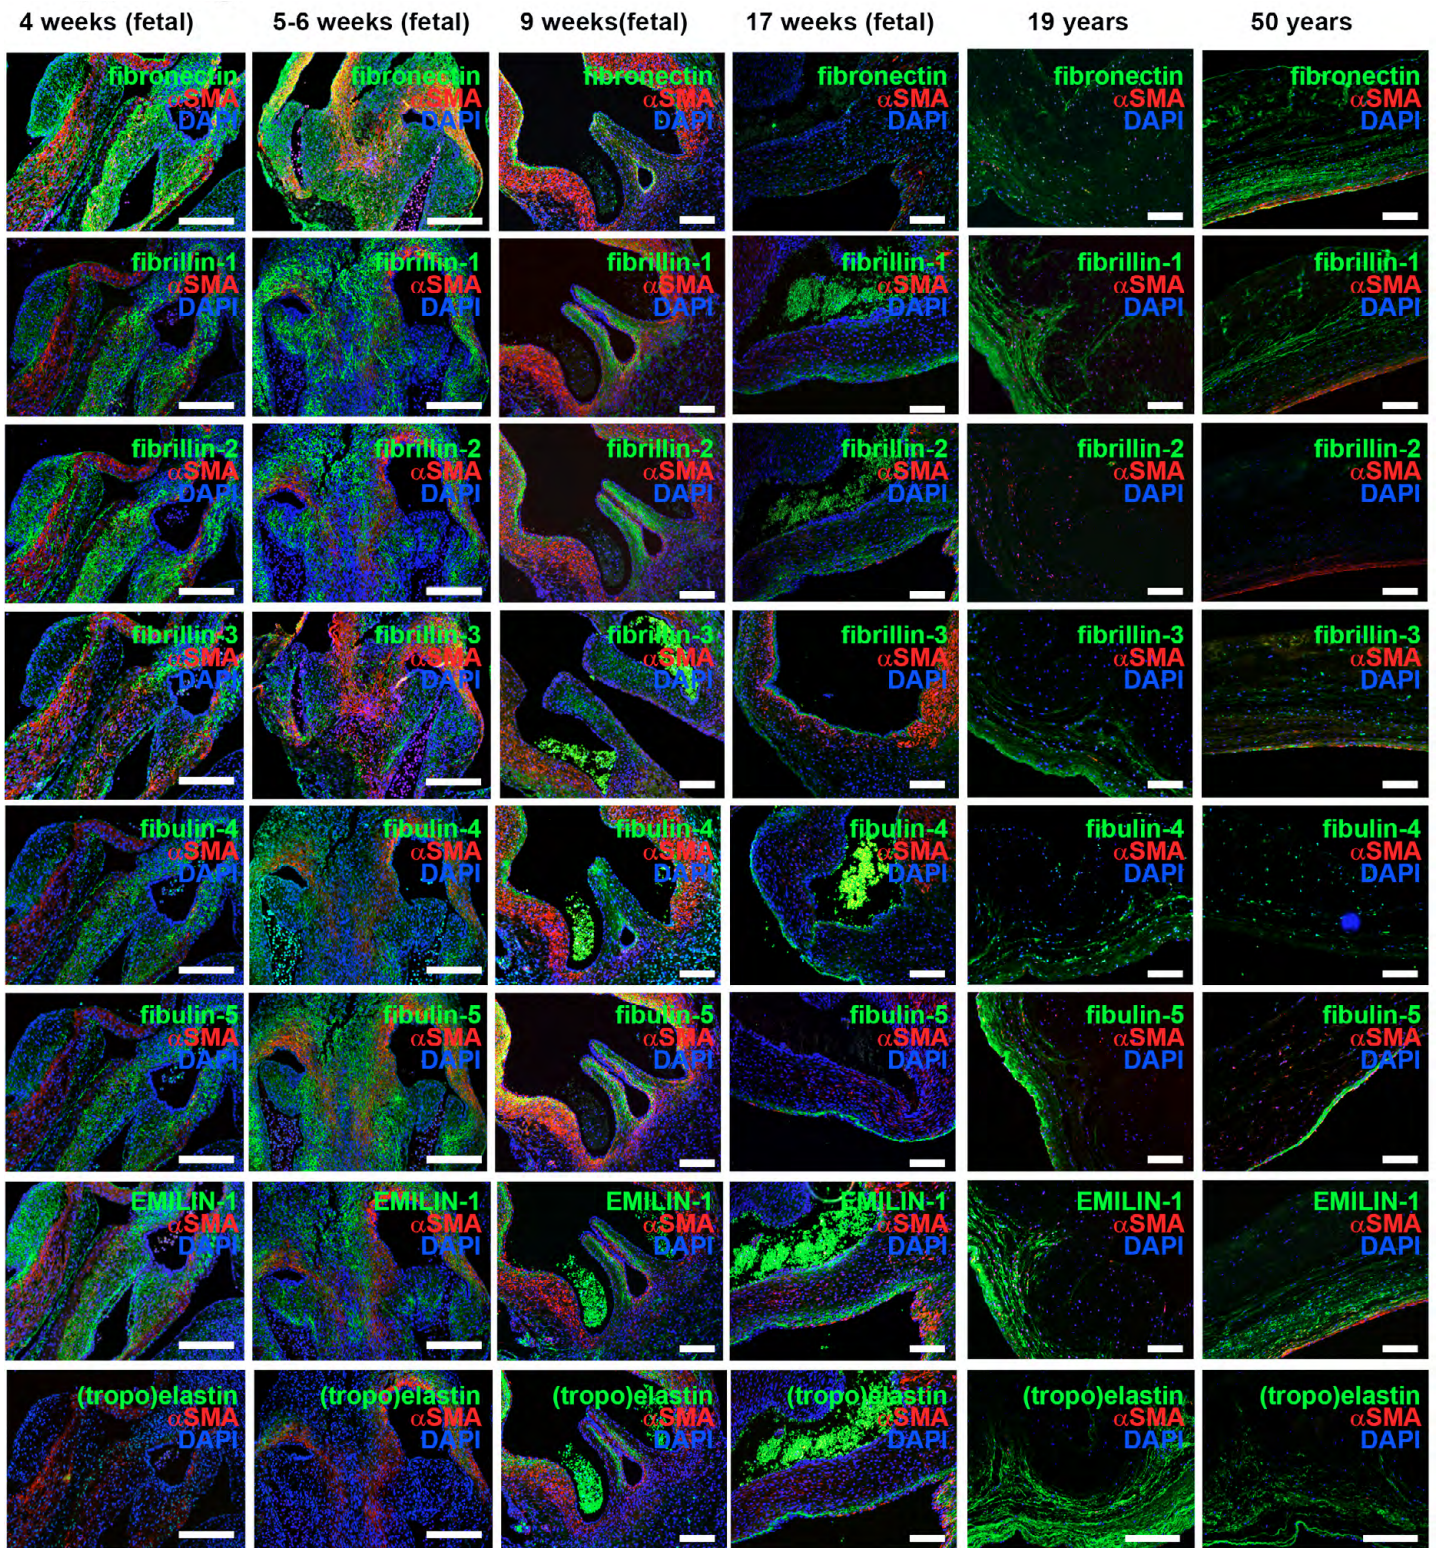

**Fig. S1. Spatial protein expression patterns of elastic fiber components during human semilunar valve development.** Immunofluorescence images depict fibronectin, fibrillin 1, fibrillin 2, fibrillin 3, fibulin 4, fibulin 5, EMILIN1 and tropoelastin/elastin (all in green) in fetal (4, 5-6, 9 and 17 weeks), adolescent (19 years) and adult (50 years) cardiac tissues.  $\alpha$ SMA-expressing cells are in red. DAPI-stained nuclei are in blue. Scale bars: 200  $\mu$ m.
